# Supplementary material
Source: PubMed Central journal article supplement (PMC5414499)
Supplement: jnm183111SupplementaryData.pdf [file jnm183111SupplementaryData.pdf]

**Supplemental Table 1.** Impact of follow up PET/CT scans with different indication on the patient management

| n                                                                              | indications                                                                                      | No Tx to no Tx | Tx to continue the same Tx | No Tx to new Tx | Tx to change in Tx | Tx to stop Tx | not known | Total |
|--------------------------------------------------------------------------------|--------------------------------------------------------------------------------------------------|----------------|----------------------------|-----------------|--------------------|---------------|-----------|-------|
| <b>FDG-PET/CT for diagnosis of tumor recurrence</b>                            |                                                                                                  |                |                            |                 |                    |               |           |       |
| 1                                                                              | Prior clinical suspicion of tumor recurrence                                                     | 25             | 7                          | 15              | 5                  | 1             | 3         | 56    |
| 2                                                                              | Prior rising tumor markers or abnormal laboratory tests suggesting tumor recurrence              | 8              | 10                         | 4               | 3                  | 0             | 0         | 25    |
| 3                                                                              | Prior suspicious imaging (CT or MRI) for tumor recurrence                                        | 31             | 7                          | 35              | 11                 | 0             | 7         | 91    |
| 4                                                                              | Prior indeterminate or suspicious PET/CT scan for tumor recurrence                               | 82             | 18                         | 22              | 4                  | 0             | 5         | 131   |
| <b>FDG-PET/CT before starting therapy for tumor recurrence</b>                 |                                                                                                  |                |                            |                 |                    |               |           |       |
| 5                                                                              | Restaging after confirmation of tumor recurrence                                                 | 4              | 2                          | 10              | 2                  | 0             | 0         | 18    |
| 6                                                                              | If extent of disease will alter therapy or if a new baseline was needed before change in therapy | 2              | 13                         | 18              | 10                 | 0             | 3         | 46    |
| <b>FDG-PET/CT to assess therapy response for tumor recurrence</b>              |                                                                                                  |                |                            |                 |                    |               |           |       |
| 7                                                                              | Therapy response assessment of recurrence                                                        | 97             | 73                         | 45              | 30                 | 8             | 13        | 266   |
| 8                                                                              | Intra-treatment assessment of recurrence                                                         | 0              | 162                        | 12              | 30                 | 2             | 4         | 210   |
| 9                                                                              | Follow up scan to assess the previous equivocal response                                         | 9              | 11                         | 6               | 3                  | 0             | 2         | 31    |
| <b>Follow up FDG-PET/CT after completion of treatment for tumor recurrence</b> |                                                                                                  |                |                            |                 |                    |               |           |       |
| 10                                                                             | Follow up for stable disease                                                                     | 25             | 82                         | 9               | 12                 | 1             | 3         | 132   |
| 11                                                                             | Follow-up for disease progression                                                                | 13             | 43                         | 25              | 32                 | 1             | 8         | 122   |

|              |                                                                  |     |     |     |     |    |    |      |
|--------------|------------------------------------------------------------------|-----|-----|-----|-----|----|----|------|
| 12           | Follow up of disease in remission or per clinical trial protocol | 400 | 79  | 24  | 5   | 1  | 22 | 531  |
| <b>Total</b> |                                                                  | 696 | 507 | 225 | 147 | 14 | 70 | 1659 |
